# Supplementary material for: Housing index, urbanisation level and lifetime prevalence of depressive and anxiety disorders: a cross-sectional analysis of the Colombian national mental health survey
Source: PubMed Central journal article supplement — BMJ Open. 2018 Jun 7;8(6):e019065. doi: 10.1136/bmjopen-2017-019065 (PMC6009503; doi:10.1136/bmjopen-2017-019065), 2018-06-07
Supplement: bmjopen-2017-019065supp003.pdf [file bmjopen-2017-019065supp003.pdf]

Supplementary table 3: Relative Index of Inequality (based on housing score)\*, in a multivariate model for lifetime prevalence of any mental disorder measured by the self-reporting questionnaire (SRQ)

|                                                                                                                               | self-reporting questionnaire (SRQ) |             |       |         |              |  |
|-------------------------------------------------------------------------------------------------------------------------------|------------------------------------|-------------|-------|---------|--------------|--|
|                                                                                                                               | Urban                              |             | Rural |         |              |  |
|                                                                                                                               | RII/OR*                            | 95% CI      |       | RII/OR* | 95% CI       |  |
| <b>Housing score (RII)</b>                                                                                                    | 1,13                               | (0,63 2,03) |       | 0,15    | (0,06 0,39)  |  |
| <b>Demographic characteristics</b>                                                                                            |                                    |             |       |         |              |  |
| Age (continuous)                                                                                                              | 1,00                               | (0,99 1,01) |       | 1,00    | (0,99 1,02)  |  |
| Female sex (reference category: male)                                                                                         | 1,57                               | (1,22 2,02) |       | 1,41    | (0,93 2,12)  |  |
| Region (reference category: Central)                                                                                          |                                    |             |       |         |              |  |
| Atlantic                                                                                                                      | 0,72                               | (0,50 1,04) |       | 0,88    | (0,38 2,06)  |  |
| Bogota                                                                                                                        | 1,27                               | (0,83 1,92) |       | 2,03    | (0,70 5,87)  |  |
| Oriental                                                                                                                      | 0,69                               | (0,49 0,97) |       | 0,77    | (0,45 1,29)  |  |
| Pacific                                                                                                                       | 1,10                               | (0,81 1,50) |       | 0,92    | (0,54 1,55)  |  |
| <b>Marital status (reference category = Living with partner, married)</b>                                                     |                                    |             |       |         |              |  |
| Separated, widow, divorced                                                                                                    | 1,03                               | (0,71 1,49) |       | 1,24    | (0,62 2,46)  |  |
| Single                                                                                                                        | 1,12                               | (0,86 1,48) |       | 1,29    | (0,81 2,05)  |  |
| <b>Other indicators of socioeconomic level</b>                                                                                |                                    |             |       |         |              |  |
| <b>Educational level (reference category = no or primary education)</b>                                                       |                                    |             |       |         |              |  |
| Secondary                                                                                                                     | 0,66                               | (0,48 0,90) |       | 0,58    | (0,34 0,97)  |  |
| Technical                                                                                                                     | 0,42                               | (0,26 0,68) |       | 0,11    | (0,02 0,54)  |  |
| University                                                                                                                    | 0,23                               | (0,13 0,44) |       | 0,36    | (0,04 2,98)  |  |
| <b>Affiliation to the social security system<sup>a</sup> (reference category = contributive)</b>                              |                                    |             |       |         |              |  |
| Special                                                                                                                       | 1,13                               | (0,39 3,30) |       | 2,13    | (0,28 16,10) |  |
| Subsidized                                                                                                                    | 1,13                               | (0,84 1,52) |       | 1,77    | (0,97 3,22)  |  |
| Not affiliated                                                                                                                | 1,19                               | (0,78 1,80) |       | 2,76    | (1,13 6,77)  |  |
| <b>Other relevant variables for mental health</b>                                                                             |                                    |             |       |         |              |  |
| <b>Familiar dysfunction (reference category: no familiar dysfunction)</b>                                                     |                                    |             |       |         |              |  |
| Light                                                                                                                         | 1,17                               | (0,84 1,63) |       | 1,83    | (1,06 3,16)  |  |
| Moderate                                                                                                                      | 2,05                               | (1,39 3,03) |       | 2,58    | (1,41 4,74)  |  |
| Severe                                                                                                                        | 4,19                               | (2,66 6,60) |       | 4,29    | (1,71 10,71) |  |
| <b>How often can you talk to someone about your problems or difficulties or ask for advice? (reference category = always)</b> |                                    |             |       |         |              |  |
| Almost always                                                                                                                 | 1,04                               | (0,69 1,58) |       | 0,75    | (0,34 1,64)  |  |
| Sometimes                                                                                                                     | 0,95                               | (0,68 1,34) |       | 1,15    | (0,66 2,01)  |  |
| Never                                                                                                                         | 1,08                               | (0,73 1,60) |       | 0,93    | (0,48 1,77)  |  |
| <b>Experience with armed conflict (reference category: no)</b>                                                                | 2,26                               | (1,48 3,44) |       | 1,12    | (0,57 2,21)  |  |

\* Housing score results are Relative Index of Inequality, for other variables results are odds ratios, both with their respective 95% confidence intervals.

<sup>a</sup> The contributive regime includes those in formal employment or independent jobs with economic capacity to pay a monthly fee; special regime includes armed forces, workers in the petroleum industry and teachers in the public sector; in the subsidized regime are those classified as 'poor' and their insurance fee is paid by the government; and not affiliated are those without health insurance.
